# Supplementary material for: Validation of the Multi-INdependence Dimensions (MIND) questionnaire for prolonged mechanically ventilated subjects
Source: Springer Nature journal article supplement (doi:10.1186/s12890-019-0870-2), 2019-06-20

# **MIND Scale**

## **Multi-INdependence Dimensions questionnaire**

Version April 2019

# MIND (I)

## 1. Cognition (average both items)

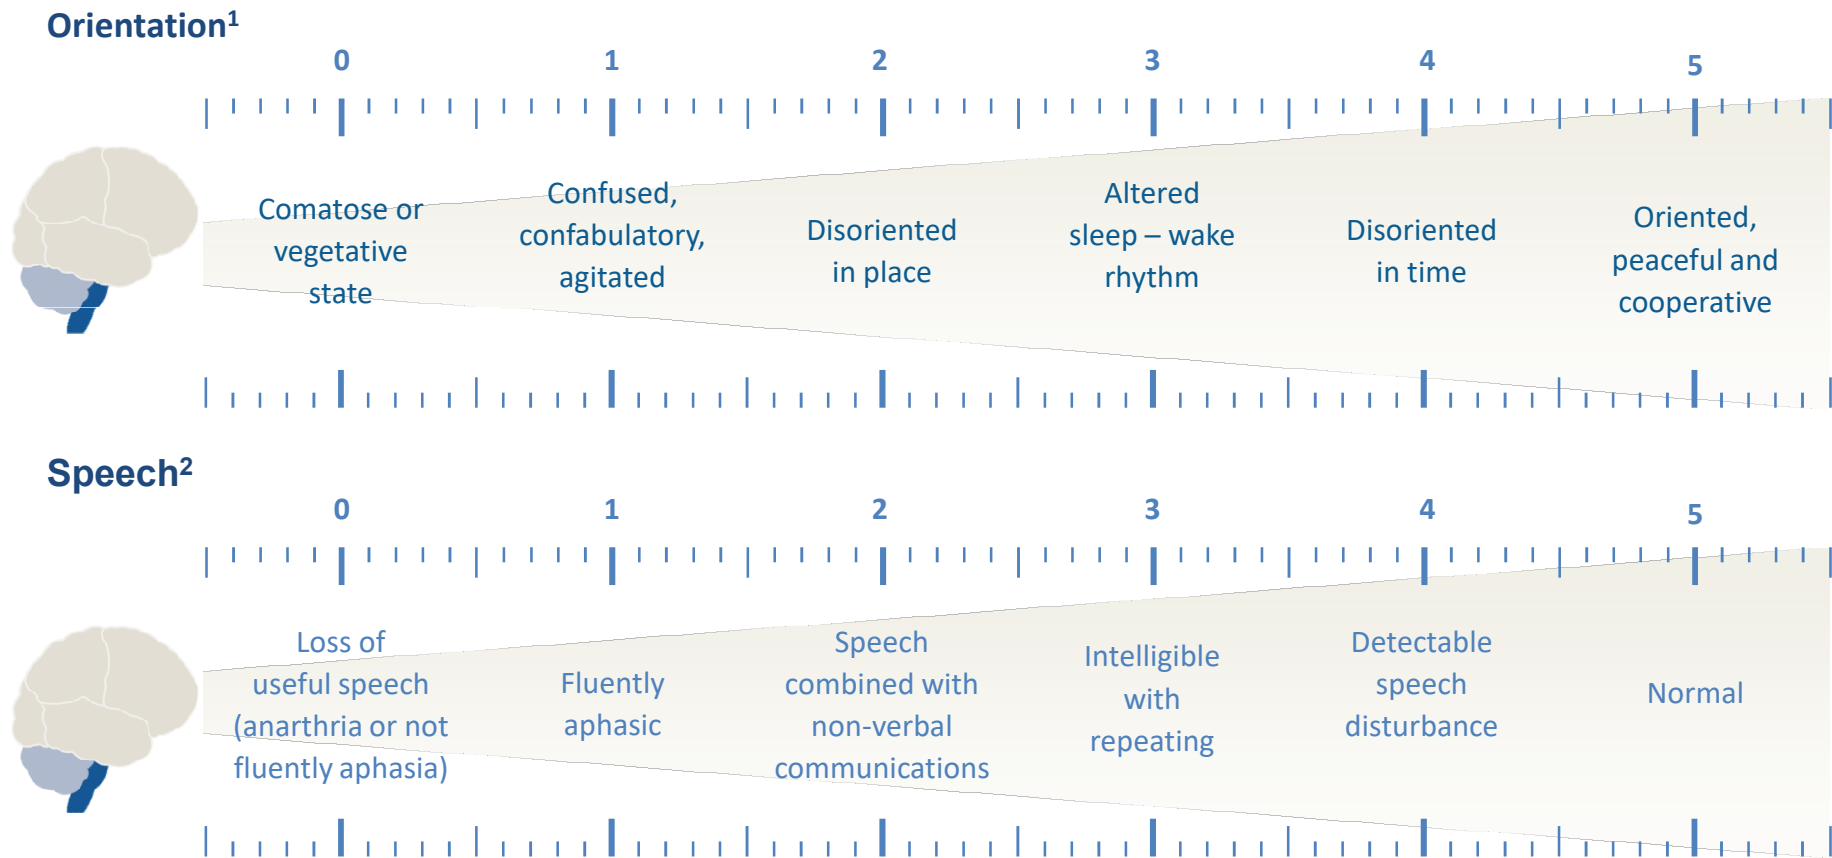

# MIND (II)

## 2. Feeding/swallowing<sup>3</sup>

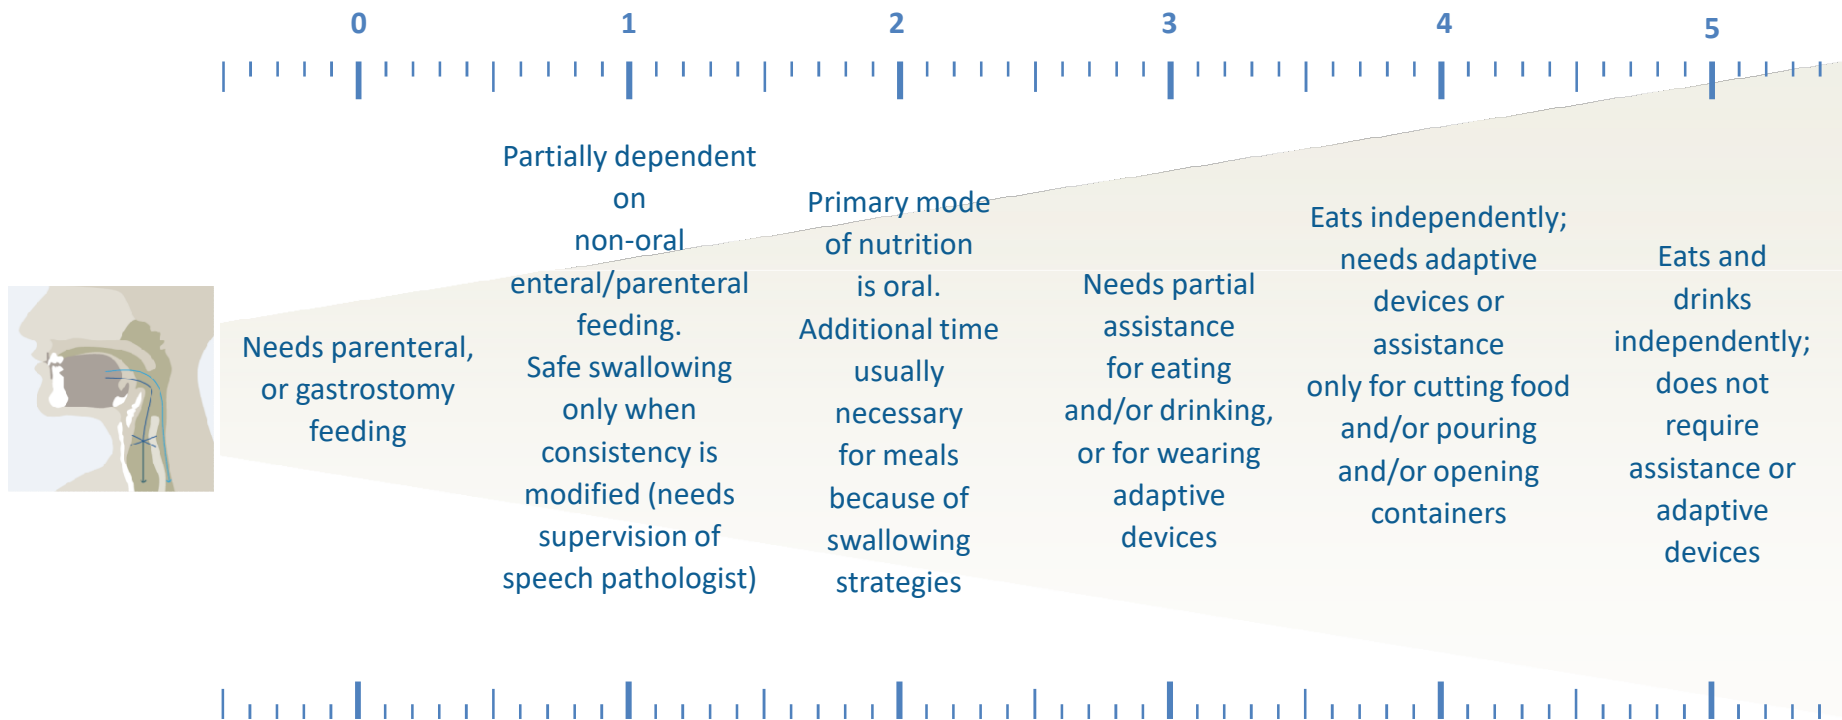

# MIND (III)

## 3. Sleep (total sum of 5 questions/5)

Rate the patient's last night:

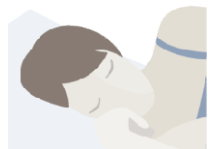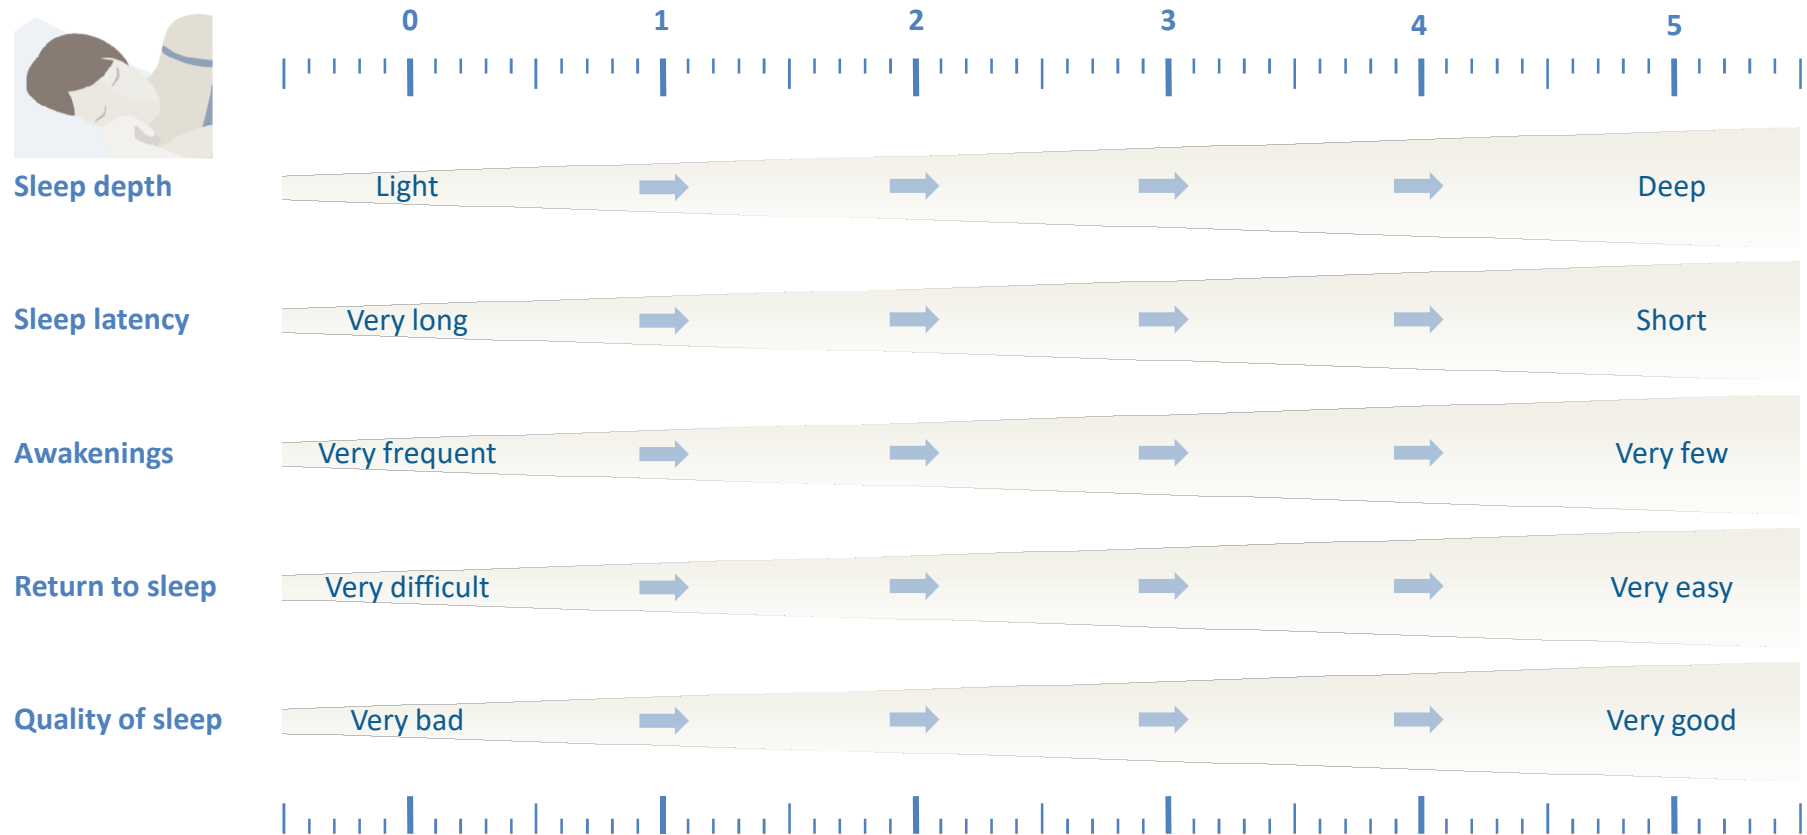

# MIND(IV)

## 4. Skin integrity<sup>4</sup>

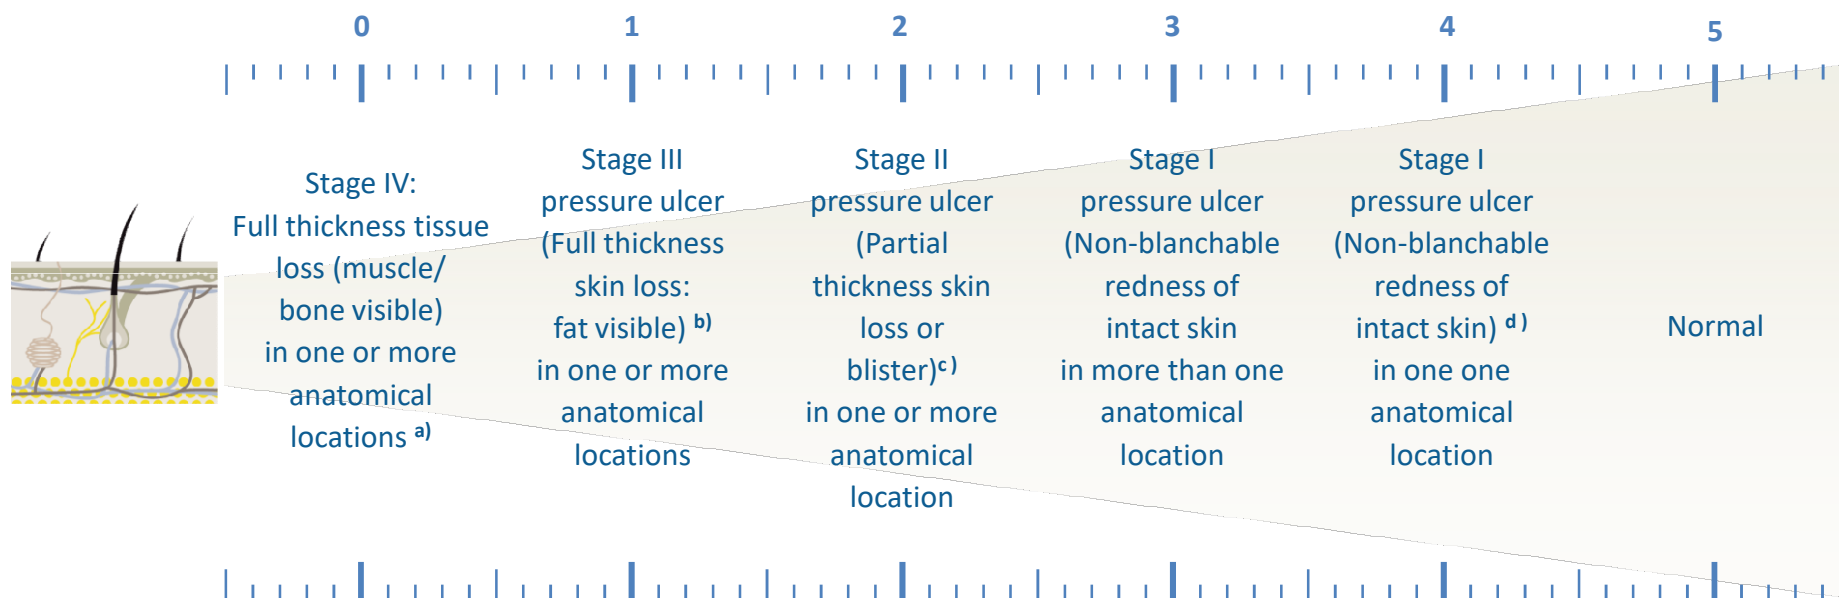

# MIND (V-VI)

## 5. Oxygenation

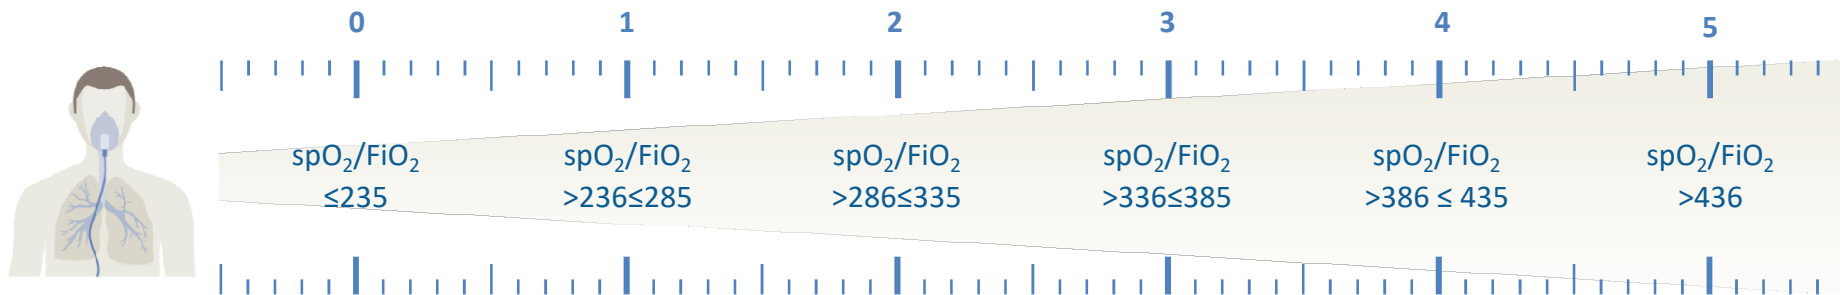

## 6. Cough strength

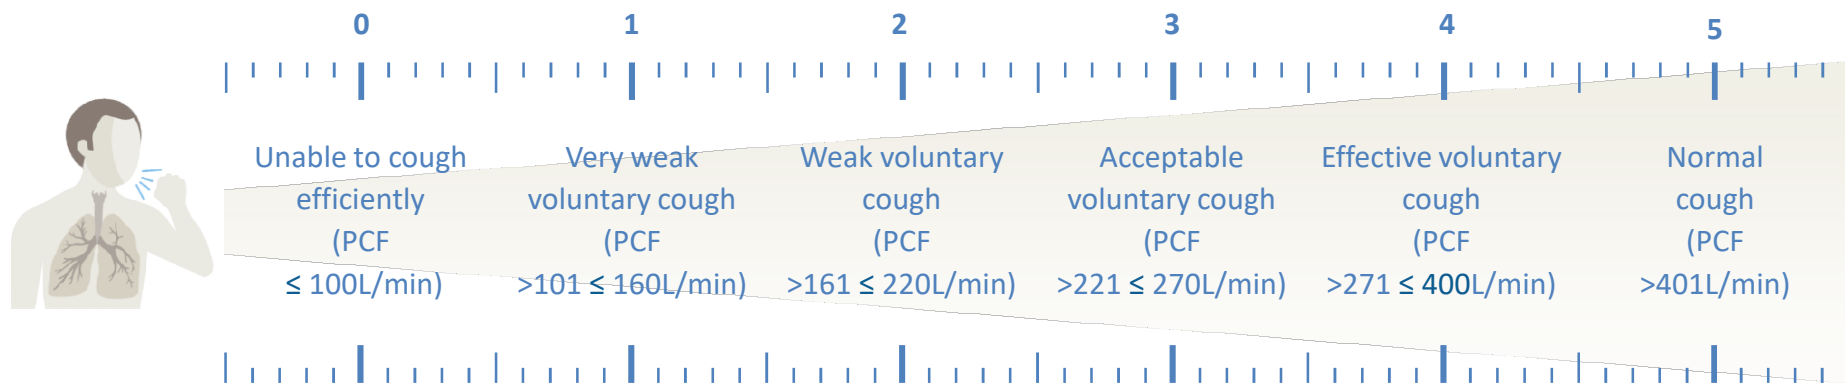

# MIND (VII)

## 7. Secretion management

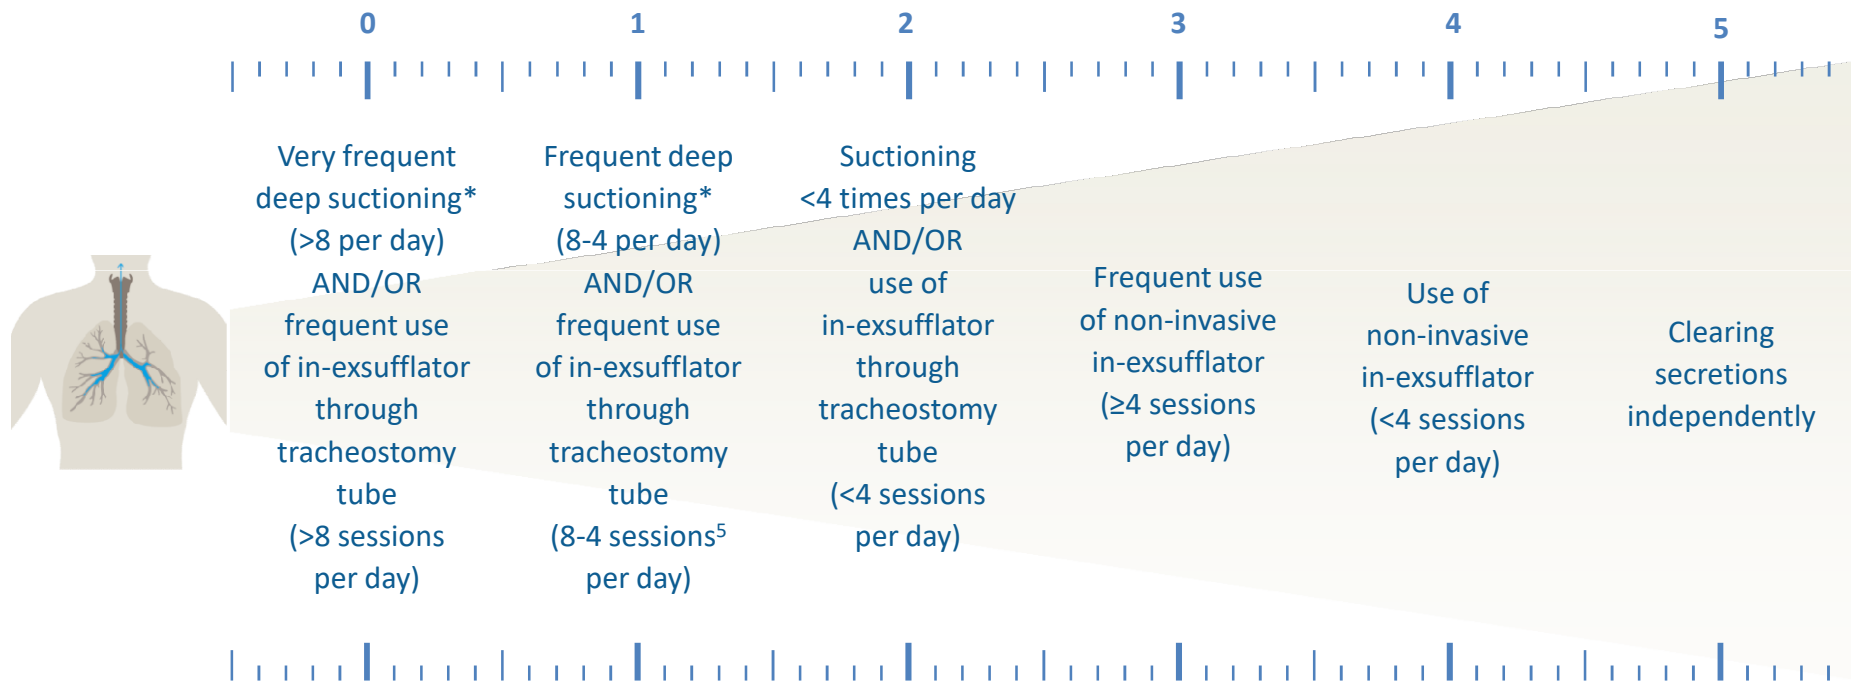

# MIND (VIII)

## 8. Mobility (average both items)

### Sit to stand<sup>6</sup>

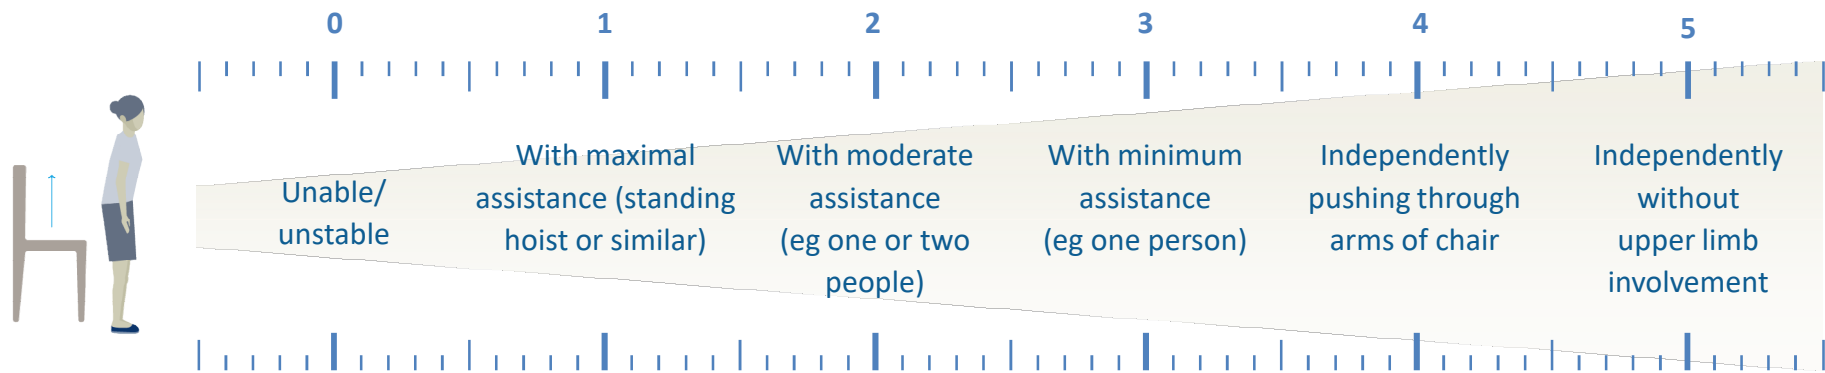



# MIND (VIII)

## 8. Mobility (average both items)

### Stand to sit<sup>7</sup>

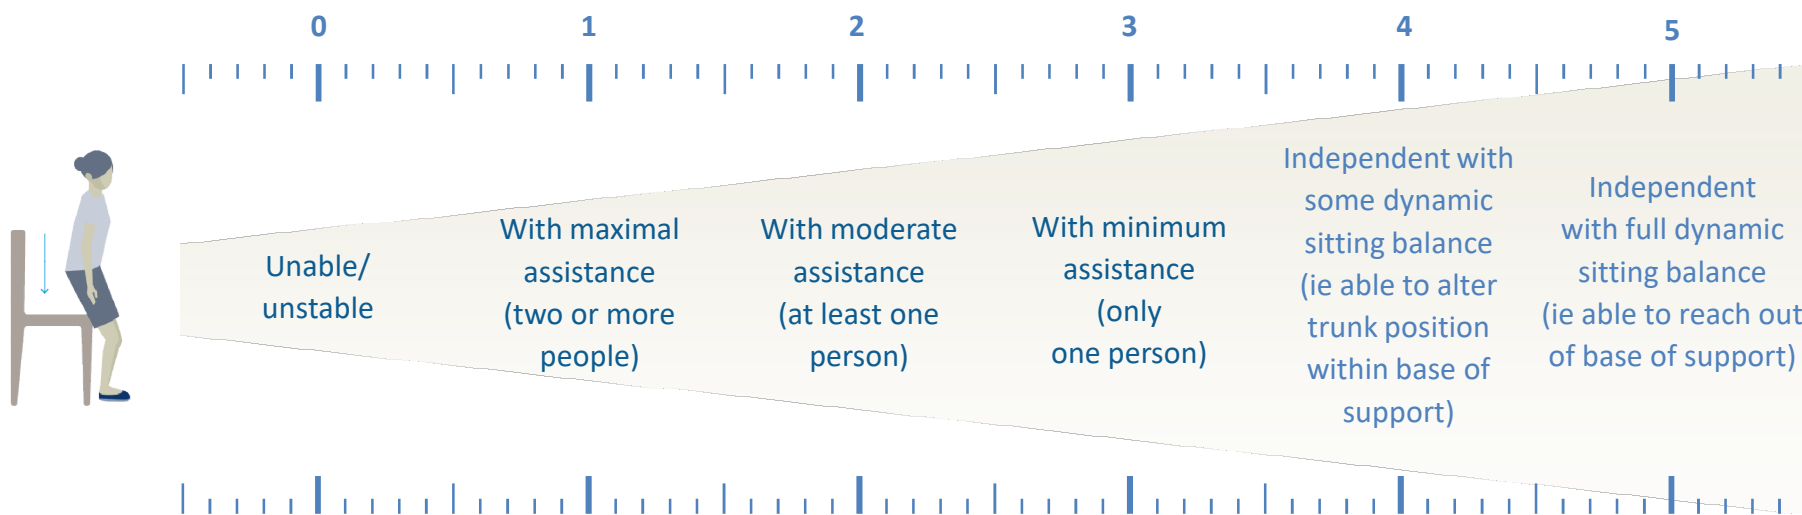

# MIND (IX)

## 9. Upper limb and lower limb strength (average both items)<sup>8</sup>

### Upper limb strength

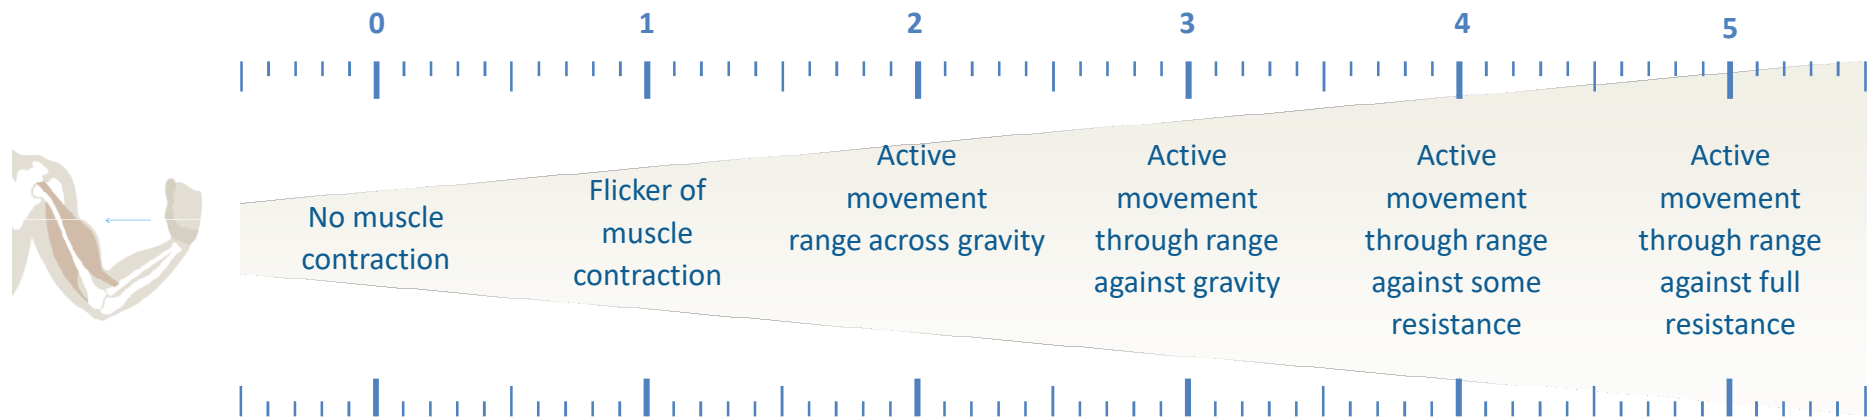

# MIND (IX)

## 9. Upper limb and lower limb strength (average both items)<sup>8</sup>

### Lower limb strength

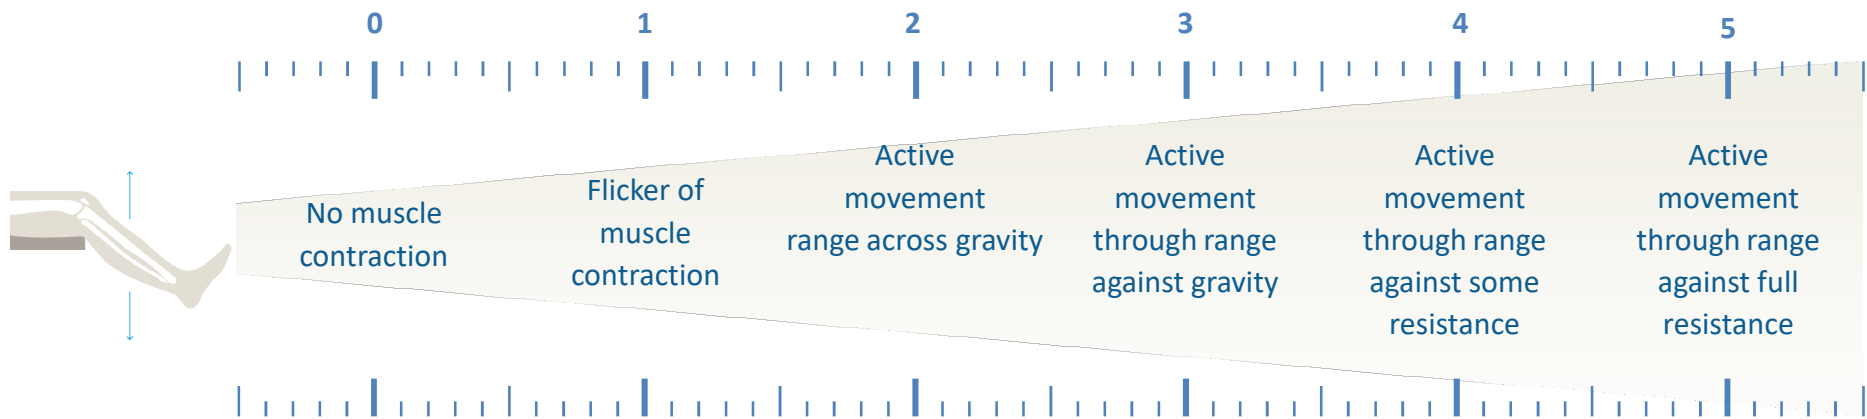

# MIND (X)

## 10. Ventilator dependence<sup>9</sup>

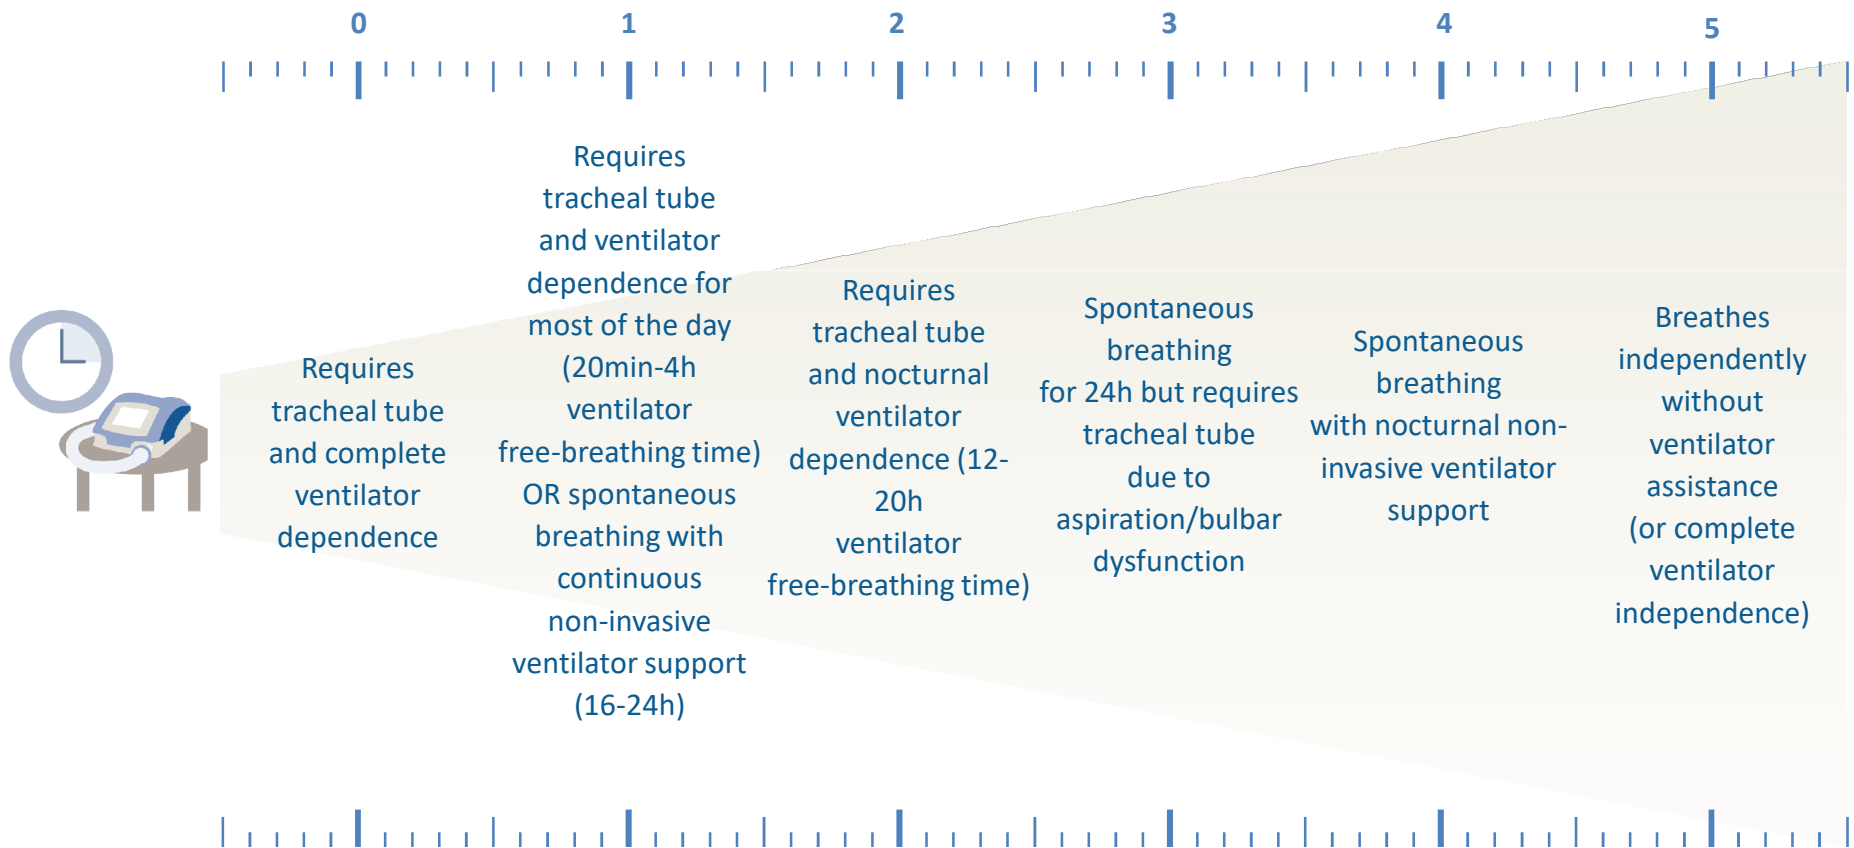

# MIND (XI)

## 11. Co-morbidities

From the Modified Charlson index list:

1. Congestive heart failure, 2. Coronary artery disease, 3. Diabetes, 4. Peripheral vascular disease, 5. Stroke, 6. Chronic Obstructive Pulmonary disease, 7. Connective tissue disorder, 8. Renal insufficiency, 9. Malignancy

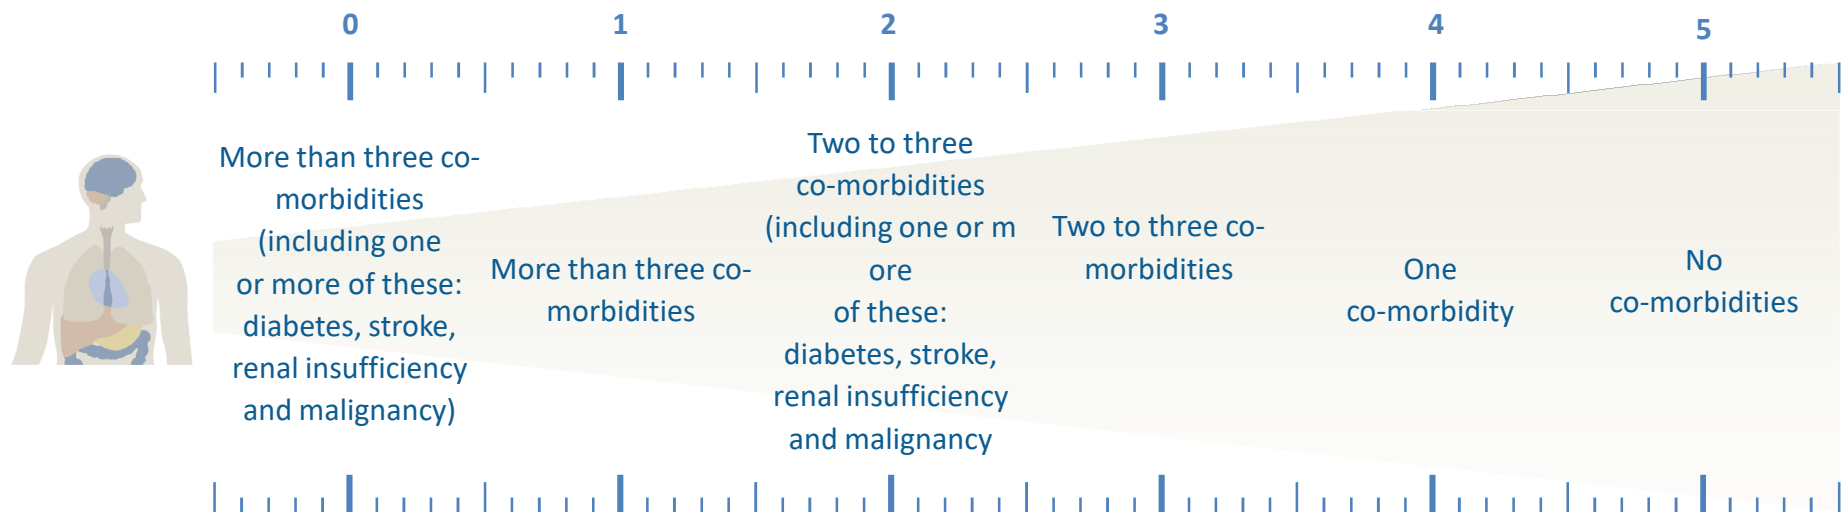

Supplement: MOESM1 [file 16838524]
